# Supplementary material for: Gut Microbiota Enterotypes Mediate the Effects of Dietary Patterns on Colorectal Neoplasm Risk in a Chinese Population
Source: MDPI journal article supplement (doi:10.3390/nu15132940), 2023-06-28
Supplement: s1 [file s1]

# Supplementary Materials

## Supplementary Table

**Table S1.** Inclusion and exclusion criteria for the study population.

| Inclusion criteria                                                                                                                                | Exclusion criteria                                                                                                                                                                                                                                                                                                                                                                                                                                                                                                                                                                                                                                                    |
|---------------------------------------------------------------------------------------------------------------------------------------------------|-----------------------------------------------------------------------------------------------------------------------------------------------------------------------------------------------------------------------------------------------------------------------------------------------------------------------------------------------------------------------------------------------------------------------------------------------------------------------------------------------------------------------------------------------------------------------------------------------------------------------------------------------------------------------|
| Han Chinese individuals aged 40 or older who were recommended to undergo colonoscopy at Changhai Hospital (Shanghai, China) between 2015 and 2016 | Incomplete colonoscopies<br><br>Antibiotic use in the past 6 months<br><br>Pregnancy<br><br>A history of colorectal neoplasm, inflammatory bowel disease, hereditary polyposis syndromes, or any other type of cancer<br><br>A family history of colorectal cancer in a first- or second-degree relative<br><br>A family history of colorectal adenoma or familial hereditary syndrome, including familial adenomatous polyposis, hereditary nonpolyposis colorectal cancer, Turcot syndrome, Oldfield syndrome, and juvenile polyposis syndrome in a first-degree relative under 60 years of age<br><br>Prior chemotherapy, radiation therapy, or colorectal surgery |

**Table S2.** Statistical parameters and methods for each analysis.

| <b>Analysis</b>                                                                        | <b>Statistical parameters</b>                                                                                                     | <b>Statistical methods</b>                                                                                                                                                                                                  |
|----------------------------------------------------------------------------------------|-----------------------------------------------------------------------------------------------------------------------------------|-----------------------------------------------------------------------------------------------------------------------------------------------------------------------------------------------------------------------------|
| Identification of dietary patterns                                                     | Factor loadings, eigenvalues                                                                                                      | Exploratory structural equation modeling (ESEM) with oblique rotation                                                                                                                                                       |
| Relationship between dietary patterns and risk of colorectal neoplasms                 | Odds ratios (ORs), confidence intervals (CIs), P values                                                                           | Binary logistic backward stepwise regression analysis                                                                                                                                                                       |
| Relationship between dietary patterns and risk of colorectal neoplasm subtypes         | ORs, CIs, P values, $P_{\text{heterogeneity}}$ values                                                                             | Dirichlet multinomial mixture model (DMM) for community typing, Wald test for heterogeneity, binary logistic backward stepwise regression analysis                                                                          |
| Gut microbiota composition analysis between subgroups                                  | Alpha-diversity indices, beta-diversity distances, P values, logarithmic linear discriminant analysis (LDA) score                 | Kruskal-Wallis test, Dunn's test, principal coordinates analysis (PCoA), permutational multivariate analysis of variance (PERMANOVA), LDA effect size (LEfSe) method                                                        |
| Metabolomics-based analysis of gut microbiota functional differences between subgroups | Metabolite features, logarithmic LDA scores, P values, pathway enrichment scores, pathway impact values, correlation coefficients | Logarithmic transformation, Z-score standardization, PCoA, LEfSe method, Kyoto Encyclopedia of Genes and Genomes (KEGG) mapping, pathway enrichment analysis, pathway topology analysis, Spearman's correlation coefficient |

**Table S3.** Geomin-rotated factor loading matrix for dietary patterns.

| Food item <sup>a</sup> | Healthy pattern | High-fat pattern |
|------------------------|-----------------|------------------|
| Vegetable              | 0.365           |                  |
| Fruit                  | 0.746           |                  |
| Milk                   | 0.592           |                  |
| Yoghourt               | 0.611           |                  |
| Pickle                 |                 | 0.660            |
| Fry                    |                 | 0.831            |
| Red meat               |                 | 0.426            |

<sup>a</sup> Only food items with structure coefficients greater than 0.30 are displayed. Structure coefficients, also known as factor loadings, refer to the Geomin-rotated factor loading matrix.

**Table S4.** Characteristics of all participants by healthy and high-fat dietary score tertiles.

| Characteristic                                          | Healthy pattern |      | High-fat pattern |      |
|---------------------------------------------------------|-----------------|------|------------------|------|
|                                                         | Q1              | Q3   | Q1               | Q3   |
| <b>Age, years (mean)</b>                                | 58.9            | 60.3 | 61.0             | 57.1 |
| <b>Sex, man (%)</b>                                     | 56.4            | 48.7 | 44.6             | 61.5 |
| Education degree (%)                                    |                 |      |                  |      |
| Illiteracy                                              | 8.7             | 1.8  | 8.3              | 4.6  |
| Primary                                                 | 21.0            | 9.7  | 21.0             | 14.6 |
| Middle                                                  | 59.0            | 61.1 | 59.9             | 60.8 |
| High                                                    | 11.3            | 27.4 | 10.8             | 20.0 |
| Physical activity (%)                                   |                 |      |                  |      |
| Sedentary                                               | 18.5            | 26.5 | 17.2             | 19.2 |
| Mild                                                    | 35.4            | 50.4 | 42.7             | 43.1 |
| Moderate                                                | 27.7            | 20.4 | 24.8             | 24.6 |
| Severe                                                  | 18.5            | 2.7  | 15.3             | 13.1 |
| <b>Smoking (%)</b>                                      | 36.9            | 20.4 | 24.8             | 33.1 |
| <b>Smoking, pack-years (mean)</b>                       | 10.7            | 4.6  | 6.0              | 9.7  |
| <b>Drinking (%)</b>                                     | 26.2            | 15.9 | 16.6             | 30.8 |
| Body mass index <sup>a</sup> , kg/m <sup>2</sup> (mean) | 23.7            | 23.7 | 23.0             | 24.7 |

Abbreviations: SD, standard deviation.

<sup>a</sup> Body mass index: weight (kg)/height (m)<sup>2</sup>.

**Table S5.** Top four food items (ranked by factor loadings) in the healthy dietary pattern and risk of colorectal neoplasms, overall and subclassified by gut microbiota enterotypes <sup>a</sup>

| Group                                           | Consumption frequency |                     | <i>P</i> <sup>b</sup> | <i>P</i> <sub>heterogeneity</sub> <sup>c</sup> |
|-------------------------------------------------|-----------------------|---------------------|-----------------------|------------------------------------------------|
|                                                 | Occasional            | regular             |                       |                                                |
| <b>Vegetable</b>                                |                       |                     |                       |                                                |
| Control (N=160), No. (%)                        | 4 (2.5)               | 156 (97.5)          |                       |                                                |
| All colorectal neoplasm (N=250), No. (%)        | 20 (8.0)              | 230 (92.0)          | 0.021                 |                                                |
| Multivariable-adjusted OR (95% CI) <sup>d</sup> | 1 (referent)          | 0.39 (0.13 to 1.18) | 0.094                 |                                                |
| Type I colorectal neoplasm (N=118), No. (%)     | 8 (6.8)               | 110 (93.2)          | 0.083                 | 0.372                                          |
| Multivariable-adjusted OR (95% CI) <sup>d</sup> | 1 (referent)          | 0.41 (0.12 to 1.40) | 0.153                 | (type I vs II)                                 |
| Type II colorectal neoplasm (N=100), No. (%)    | 10 (10.0)             | 90 (90.0)           | 0.009                 | 0.564                                          |
| Multivariable-adjusted OR (95% CI) <sup>d</sup> | 1 (referent)          | 0.26 (0.08 to 0.86) | 0.028                 | (type II vs III)                               |
| Type III colorectal neoplasm (N=32), No. (%)    | 2 (6.3)               | 30 (93.8)           | 0.311                 | 0.981                                          |
| Multivariable-adjusted OR (95% CI) <sup>d</sup> | 1 (referent)          | 0.36 (0.06 to 2.12) | 0.258                 | (type I vs III)                                |
| <b>Fruit</b>                                    |                       |                     |                       |                                                |
| Control (N=160), No. (%)                        | 42 (26.3)             | 118 (73.8)          |                       |                                                |
| All colorectal neoplasm (N=250), No. (%)        | 103 (41.2)            | 147 (58.8)          | 0.002                 |                                                |
| Multivariable-adjusted OR (95% CI) <sup>d</sup> | 1 (referent)          | 0.55 (0.36 to 0.86) | 0.009                 |                                                |
| Type I colorectal neoplasm (N=118), No. (%)     | 49 (41.5)             | 69 (58.5)           | 0.007                 | 0.314                                          |
| Multivariable-adjusted OR (95% CI) <sup>d</sup> | 1 (referent)          | 0.51 (0.31 to 0.85) | 0.010                 | (type I vs II)                                 |
| Type II colorectal neoplasm (N=100), No. (%)    | 48 (48.0)             | 52 (52.0)           | <0.001                | 0.006                                          |
| Multivariable-adjusted OR (95% CI) <sup>d</sup> | 1 (referent)          | 0.41 (0.24 to 0.69) | 0.001                 | (type II vs III)                               |
| Type III colorectal neoplasm (N=32), No. (%)    | 6 (18.8)              | 26 (81.3)           | 0.371                 | 0.027                                          |
| Multivariable-adjusted OR (95% CI) <sup>d</sup> | 1 (referent)          | 1.54 (0.58 to 4.03) | 0.385                 | (type I vs III)                                |
| <b>Milk</b>                                     |                       |                     |                       |                                                |
| Control (N=160), No. (%)                        | 106 (66.3)            | 54 (33.8)           |                       |                                                |
| All colorectal neoplasm (N=250), No. (%)        | 175 (70.0)            | 75 (30.0)           | 0.425                 |                                                |
| Multivariable-adjusted OR (95% CI) <sup>d</sup> | 1 (referent)          | 0.89 (0.57 to 1.40) | 0.623                 |                                                |
| Type I colorectal neoplasm (N=118), No. (%)     | 80 (67.8)             | 38 (32.2)           | 0.786                 | 0.121                                          |
| Multivariable-adjusted OR (95% CI) <sup>d</sup> | 1 (referent)          | 0.81 (0.48 to 1.37) | 0.430                 | (type I vs II)                                 |
| Type II colorectal neoplasm (N=100), No. (%)    | 77 (77.0)             | 23 (23.0)           | 0.065                 | 0.012                                          |
| Multivariable-adjusted OR (95% CI) <sup>d</sup> | 1 (referent)          | 0.62 (0.35 to 1.09) | 0.098                 | (type II vs III)                               |
| Type III colorectal neoplasm (N=32), No. (%)    | 18 (56.3)             | 14 (43.8)           | 0.280                 | 0.142                                          |
| Multivariable-adjusted OR (95% CI) <sup>d</sup> | 1 (referent)          | 1.56 (0.72 to 3.43) | 0.263                 | (type I vs III)                                |
| <b>Yoghourt</b>                                 |                       |                     |                       |                                                |
| Control (N=160), No. (%)                        | 119 (74.4)            | 41 (25.6)           |                       |                                                |
| All colorectal neoplasm (N=250), No. (%)        | 203 (81.2)            | 47 (18.8)           | 0.101                 |                                                |
| Multivariable-adjusted OR (95% CI) <sup>d</sup> | 1 (referent)          | 0.71 (0.43 to 1.16) | 0.172                 |                                                |
| Type I colorectal neoplasm (N=118), No. (%)     | 97 (82.2)             | 21 (17.8)           | 0.121                 | 0.761                                          |
| Multivariable-adjusted OR (95% CI) <sup>d</sup> | 1 (referent)          | 0.59 (0.32 to 1.07) | 0.084                 | (type I vs II)                                 |
| Type II colorectal neoplasm (N=100), No. (%)    | 82 (82.0)             | 18 (18.0)           | 0.153                 | 0.301                                          |
| Multivariable-adjusted OR (95% CI) <sup>d</sup> | 1 (referent)          | 0.66 (0.35 to 1.23) | 0.186                 | (type II vs III)                               |
| Type III colorectal neoplasm (N=32), No. (%)    | 24 (75.0)             | 8 (25.0)            | 0.941                 | 0.202                                          |
| Multivariable-adjusted OR (95% CI) <sup>d</sup> | 1 (referent)          | 1.02 (0.42 to 2.48) | 0.966                 | (type I vs III)                                |

Abbreviations: CI, confidence interval; OR, odds ratio.

<sup>a</sup> Colorectal neoplasms were classified into three gut microbiota enterotypes (or subtypes), designated as type I, type II, and type III, using the Dirichlet multinomial mixture model based on their gut microbiota profiles.

<sup>b</sup> The P values represent the comparison between the case group (colorectal neoplasms, including their subtypes) and the control group, either in the univariate or multivariate analysis.

<sup>c</sup> The  $P_{\text{heterogeneity}}$  value represents a test for heterogeneity to assess whether there is a significant difference in the association between food items and the risk of different subtypes of colorectal tumors.

<sup>d</sup> The multivariable odds ratio (OR) was adjusted for potential risk factors with P-values less than 0.1 in the univariate analysis.

**Table S6.** Healthy dietary pattern score and risk of colorectal neoplasms stratified by lesion site, overall and subclassified by gut microbiota enterotypes <sup>a</sup>

| Group                                           | Healthy dietary pattern |                     |                     | <i>P</i> <sup>b</sup> | <i>P</i> <sub>heterogeneity</sub> <sup>c</sup> |
|-------------------------------------------------|-------------------------|---------------------|---------------------|-----------------------|------------------------------------------------|
|                                                 | Quartile 1              | Quartile 2          | Quartile 3          |                       |                                                |
| Control (N=160), No. (%)                        | 56 (35.0)               | 52 (32.5)           | 52 (32.5)           |                       |                                                |
| <b>Proximal colon</b> <sup>d</sup>              |                         |                     |                     |                       |                                                |
| All colorectal neoplasm (N=86), No. (%)         | 48 (55.8)               | 14 (16.3)           | 24 (27.9)           | 0.003                 |                                                |
| Multivariable-adjusted OR (95% CI) <sup>e</sup> | 1 (referent)            | 0.34 (0.17 to 0.70) | 0.51 (0.27 to 0.96) | 0.021                 |                                                |
| Type I colorectal neoplasm (N=42), No. (%)      | 20 (47.6)               | 10 (23.8)           | 12 (28.6)           | 0.303                 | 0.398                                          |
| Multivariable-adjusted OR (95% CI) <sup>e</sup> | 1 (referent)            | 0.59 (0.25 to 1.4)  | 0.6 (0.26 to 1.37)  | 0.200                 | (type I vs II)                                 |
| Type II colorectal neoplasm (N=37), No. (%)     | 23 (62.2)               | 4 (10.8)            | 10 (27.0)           | 0.005                 | 0.768                                          |
| Multivariable-adjusted OR (95% CI) <sup>e</sup> | 1 (referent)            | 0.21 (0.07 to 0.66) | 0.47 (0.21 to 1.1)  | 0.045                 | (type II vs III)                               |
| Type III colorectal neoplasm (N=7), No. (%)     | 5 (71.4)                | 0 (0.00)            | 2 (28.6)            | 0.041                 | 0.457                                          |
| Multivariable-adjusted OR (95% CI) <sup>e</sup> | 1 (referent)            | -                   | 0.43 (0.08 to 2.32) | 0.222                 | (type I vs III)                                |
| <b>Distal colon and rectum</b> <sup>d</sup>     |                         |                     |                     |                       |                                                |
| All colorectal neoplasm (N=164), No. (%)        | 91 (55.5)               | 36 (22.0)           | 37 (22.6)           | 0.001                 |                                                |
| Multivariable-adjusted OR (95% CI) <sup>e</sup> | 1 (referent)            | 0.43 (0.25 to 0.74) | 0.47 (0.27 to 0.80) | 0.003                 |                                                |
| Type I colorectal neoplasm (N=76), No. (%)      | 46 (60.5)               | 14 (18.4)           | 16 (21.1)           | 0.001                 | 0.826                                          |
| Multivariable-adjusted OR (95% CI) <sup>e</sup> | 1 (referent)            | 0.38 (0.18 to 0.8)  | 0.44 (0.21 to 0.91) | 0.014                 | (type I vs II)                                 |
| Type II colorectal neoplasm (N=63), No. (%)     | 38 (60.3)               | 15 (23.8)           | 10 (15.9)           | 0.002                 | 0.002                                          |
| Multivariable-adjusted OR (95% CI) <sup>e</sup> | 1 (referent)            | 0.43 (0.21 to 0.88) | 0.3 (0.14 to 0.67)  | 0.002                 | (type II vs III)                               |
| Type III colorectal neoplasm (N=25), No. (%)    | 7 (28.0)                | 7 (28.0)            | 11 (44.0)           | 0.525                 | 0.002                                          |
| Multivariable-adjusted OR (95% CI) <sup>e</sup> | 1 (referent)            | 0.96 (0.31 to 2.98) | 1.65 (0.59 to 4.62) | 0.319                 | (type I vs III)                                |

Abbreviations: CI, confidence interval; OR, odds ratio.

<sup>a</sup> Colorectal neoplasms were classified into three gut microbiota enterotypes (or subtypes), designated as type I, type II, and type III, using the Dirichlet multinomial mixture model based on their gut microbiota profiles.

<sup>b</sup> The *P* values represent the comparison between the case group (colorectal neoplasms, including their subtypes) and the control group, either in the univariate or multivariate analysis. In the multivariate analysis, *P* values were determined by the linear trend test, which utilized multivariable logistic regression.

<sup>c</sup> The *P*<sub>heterogeneity</sub> value represents a test for heterogeneity to assess whether there is a significant difference in the association between the healthy pattern score and the risk of different subtypes of colorectal tumors.

<sup>d</sup> The proximal colon was defined as the caecum, ascending colon, hepatic flexure, transverse colon, and splenic flexure, while the distal colon was defined as

the descending colon, sigmoid colon, and rectosigmoid junction.

<sup>c</sup> The multivariable odds ratio (OR) was adjusted for potential risk factors with P-values less than 0.1 in the univariate analysis.

**Table S7.** Post-hoc pairwise comparisons of alpha-diversity indices in CRC and CRA subgroups using Dunn's test for multiple comparisons <sup>a</sup>

| Subgroup statistics           | Colorectal cancer |                |            |            | Colorectal adenoma |                |            |            |
|-------------------------------|-------------------|----------------|------------|------------|--------------------|----------------|------------|------------|
|                               | Chao              | ACE            | Shannon    | Simpson    | Chao               | ACE            | Shannon    | Simpson    |
| Type I                        |                   |                |            |            |                    |                |            |            |
| Median                        | 259.50            | 268.50         | 2.94       | 0.11       | 235.50             | 239.50         | 2.86       | 0.11       |
| Q1, Q3                        | 217.00, 299.75    | 218.75, 307.00 | 2.54, 3.37 | 0.07, 0.17 | 187.75, 264.50     | 200.00, 278.75 | 2.55, 3.10 | 0.09, 0.16 |
| Type II                       |                   |                |            |            |                    |                |            |            |
| Median                        | 385.00            | 379.00         | 3.63       | 0.07       | 379.50             | 371.00         | 3.65       | 0.06       |
| Q1, Q3                        | 332.50, 437.00    | 337.50, 432.50 | 3.35, 3.82 | 0.05, 0.09 | 335.00, 419.00     | 335.00, 438.50 | 3.35, 3.90 | 0.05, 0.09 |
| Type III                      |                   |                |            |            |                    |                |            |            |
| Median                        | 356.00            | 363.00         | 3.33       | 0.10       | 360.00             | 348.50         | 3.09       | 0.10       |
| Q1, Q3                        | 324.75, 415.00    | 319.50, 420.50 | 2.93, 3.45 | 0.09, 0.12 | 286.75, 404.50     | 293.25, 390.25 | 2.75, 3.57 | 0.06, 0.15 |
| Type I vs. type II, P value   | < 0.001           | < 0.001        | < 0.001    | < 0.001    | < 0.001            | < 0.001        | < 0.001    | < 0.001    |
| Type I vs. type III, P value  | < 0.001           | < 0.001        | 0.153      | 0.945      | < 0.001            | < 0.001        | 0.046      | 0.207      |
| Type II vs. type III, P value | 0.349             | 0.375          | 0.015      | 0.005      | 0.222              | 0.166          | 0.001      | 0.002      |

Abbreviations: ACE, abundance-based coverage estimator; CRA, colorectal adenoma; CRC, colorectal cancer.

<sup>a</sup> Colorectal neoplasms were categorized into three distinct gut microbiota enterotypes (subtypes) – type I, type II, and type III – employing the Dirichlet multinomial mixture model according to their gut microbiota compositions. The median values are presented along with the first quartile (Q1) and third quartile (Q3) for each subtype.

**Table S8.** Genera with significant differential abundance in both CRC and CRA group comparisons between type I and type III subtypes <sup>a</sup>

| Genus_Subtype                              | Colorectal cancer |           |         | Colorectal adenoma |           |         |
|--------------------------------------------|-------------------|-----------|---------|--------------------|-----------|---------|
|                                            | Logarithm value   | LDA value | P value | Logarithm value    | LDA value | P value |
| Type I                                     |                   |           |         |                    |           |         |
| <i>Bacteroides</i>                         | 5.48              | 5.00      | 0.001   | 5.55               | 5.10      | < 0.001 |
| <i>Escherichia Shigella</i>                | 4.78              | 4.49      | < 0.001 | 4.96               | 4.60      | < 0.001 |
| <i>Lachnoclostridium</i>                   | 4.75              | 4.30      | 0.001   | 4.74               | 4.29      | < 0.001 |
| <i>Bifidobacterium</i>                     | 4.02              | 3.71      | 0.050   | 3.65               | 3.34      | 0.037   |
| <i>Flavonifractor</i>                      | 3.72              | 3.41      | < 0.001 | 3.50               | 3.11      | < 0.001 |
| <i>Tyzzerella 4</i>                        | 3.65              | 3.32      | 0.003   | 3.68               | 3.32      | 0.012   |
| <i>Lachnospiraceae UCG-010</i>             | 3.65              | 2.83      | 0.006   | 3.55               | 3.18      | < 0.001 |
| <i>Erysipelatoclostridium</i>              | 2.92              | 2.63      | < 0.001 | 3.35               | 3.05      | < 0.001 |
| <i>Erysipelotrichaceae.Incertae Sedis</i>  | 2.71              | 2.38      | < 0.001 | 2.72               | 2.51      | < 0.001 |
| <i>Pseudomonas</i>                         | 2.66              | 2.32      | 0.021   | 2.09               | 2.87      | 0.006   |
| <i>Lactococcus</i>                         | 2.58              | 2.27      | 0.001   | 2.26               | 2.62      | 0.047   |
| <i>Lachnospiraceae ND3007 group</i>        | 2.70              | 2.15      | 0.004   | 2.82               | 2.21      | 0.027   |
| <i>Eggerthella</i>                         | 2.46              | 2.04      | 0.001   | 2.04               | 2.60      | 0.001   |
| Type III                                   |                   |           |         |                    |           |         |
| <i>Prevotella 9</i>                        | 5.63              | 5.28      | < 0.001 | 5.53               | 5.17      | < 0.001 |
| <i>Ruminococcaceae UCG-002</i>             | 4.11              | 3.76      | < 0.001 | 4.04               | 3.75      | < 0.001 |
| <i>Coprococcus 2</i>                       | 3.98              | 3.71      | < 0.001 | 3.09               | 2.87      | 0.001   |
| <i>Alistipes</i>                           | 4.33              | 3.55      | 0.021   | 4.34               | 3.83      | 0.001   |
| <i>Lachnospiraceae NK4A136 group</i>       | 3.98              | 3.48      | < 0.001 | 3.89               | 3.26      | 0.001   |
| <i>Eubacterium coprostanoligenes group</i> | 3.86              | 3.45      | < 0.001 | 3.96               | 3.61      | < 0.001 |
| <i>Subdoligranulum</i>                     | 4.10              | 3.45      | 0.001   | 4.06               | 3.56      | < 0.001 |
| <i>Eubacterium ruminantium group</i>       | 3.60              | 3.28      | < 0.001 | 3.64               | 3.38      | < 0.001 |
| <i>Alloprevotella</i>                      | 3.56              | 3.28      | 0.001   | 4.25               | 3.80      | 0.001   |



|                                       |      |      |         |      |      |         |
|---------------------------------------|------|------|---------|------|------|---------|
| <i>Sutterella</i>                     | 3.99 | 3.24 | 0.003   | 3.85 | 3.35 | 0.036   |
| <i>Prevotella 2</i>                   | 3.85 | 3.22 | 0.036   | 4.34 | 4.09 | 0.008   |
| <i>Lachnospiraceae.Incertae Sedis</i> | 3.56 | 3.19 | < 0.001 | 3.72 | 2.93 | 0.011   |
| <i>Ruminococcus 1</i>                 | 3.58 | 3.18 | < 0.001 | 3.25 | 2.74 | 0.005   |
| <i>Odoribacter</i>                    | 3.72 | 3.17 | < 0.001 | 3.43 | 3.07 | < 0.001 |
| <i>Ruminococcaceae UCG-005</i>        | 3.49 | 3.17 | < 0.001 | 3.55 | 3.30 | < 0.001 |
| <i>Barnesiella</i>                    | 3.59 | 3.11 | 0.003   | 3.17 | 2.63 | 0.001   |
| <i>Ruminococcaceae UCG-014</i>        | 3.45 | 3.09 | < 0.001 | 3.72 | 3.50 | 0.007   |
| <i>Lachnospira</i>                    | 3.68 | 3.09 | < 0.001 | 3.76 | 3.08 | 0.038   |
| <i>Christensenellaceae R 7 group</i>  | 3.44 | 3.09 | < 0.001 | 3.40 | 3.13 | < 0.001 |
| <i>Butyricimonas</i>                  | 3.46 | 2.95 | 0.003   | 3.54 | 3.06 | < 0.001 |
| <i>Ruminococcaceae NK4A214 group</i>  | 3.15 | 2.75 | < 0.001 | 3.31 | 3.05 | < 0.001 |
| <i>Ruminococcaceae UCG-003</i>        | 3.29 | 2.74 | < 0.001 | 3.37 | 3.04 | < 0.001 |
| <i>Holdemanella</i>                   | 2.98 | 2.64 | 0.001   | 2.60 | 2.45 | 0.006   |
| <i>Paraprevotella</i>                 | 3.21 | 2.62 | 0.002   | 3.19 | 2.60 | 0.003   |
| <i>Ruminococcaceae UCG-010</i>        | 2.93 | 2.61 | < 0.001 | 2.61 | 2.38 | 0.003   |
| <i>Family XIII AD3011 group</i>       | 2.88 | 2.45 | 0.001   | 2.71 | 2.49 | < 0.001 |
| <i>Ruminiclostridium 6</i>            | 2.77 | 2.42 | < 0.001 | 2.26 | 2.40 | 0.001   |
| <i>Coprococcus 3</i>                  | 3.03 | 2.34 | < 0.001 | 3.26 | 2.92 | < 0.001 |
| <i>Family XIII UCG-001</i>            | 2.63 | 2.25 | 0.001   | 2.44 | 2.54 | < 0.001 |
| <i>Mitsuokella</i>                    | 2.49 | 2.20 | 0.028   | 3.35 | 3.00 | 0.018   |
| <i>Lachnospiraceae FCS020 group</i>   | 2.53 | 2.05 | < 0.001 | 2.53 | 2.35 | < 0.001 |

Abbreviations: CRA, colorectal adenoma; CRC, colorectal cancer; LDA, linear discriminant analysis.

<sup>a</sup> Colorectal neoplasms were classified into three distinct gut microbiota enterotypes (subtypes) - type I, type II, and type III - using the Dirichlet multinomial mixture model based on their gut microbiota compositions. The Logarithm value column displays the logarithm of the highest mean value among the two subtypes for each genus, representing the magnitude of the genus's abundance in the subtype with the highest mean. The LDA value column presents the logarithmic LDA score for each discriminative genus, quantifying the effect size or the degree of separation between subtypes for each genus, with higher LDA scores indicating more significant differences between subtypes. The P value column shows the p-value from the statistical test (e.g., Kruskal-Wallis

test) used to assess the significance of the differences in genus abundance between subtypes, where smaller p-values indicate a higher level of statistical significance.

**Table S9.** Differential abundance of metabolites between type I and type III subtypes in CRC group <sup>a</sup>

| Metabolite_Subtype                         | Logarithm value | LDA value | P value |
|--------------------------------------------|-----------------|-----------|---------|
| Type I                                     |                 |           |         |
| L-Valine                                   | 4.29            | 3.72      | 0.031   |
| Chenodeoxycholic acid sulfate              | 3.95            | 3.60      | 0.006   |
| Cholic acid                                | 3.78            | 3.35      | 0.006   |
| Allocholic acid                            | 3.65            | 3.30      | 0.013   |
| Ursodeoxycholic acid 3-sulfate             | 3.61            | 3.22      | 0.004   |
| Chenodeoxycholic acid 3-sulfate            | 3.63            | 3.19      | 0.029   |
| N,N,N-Trimethyl-L-alanyl-L-proline betaine | 3.54            | 3.09      | 0.025   |
| 3-Oxocholic acid                           | 3.31            | 2.95      | 0.004   |
| Oleoylcarnitine                            | 3.22            | 2.87      | <0.001  |
| LysoPA(22:5/0:0)                           | 3.27            | 2.86      | 0.003   |
| L-Palmitoylcarnitine                       | 3.20            | 2.86      | <0.001  |
| LysoPC(16:0/0:0)                           | 3.24            | 2.84      | 0.022   |
| Leucylproline                              | 3.19            | 2.78      | 0.004   |
| Linoleyl carnitine                         | 3.15            | 2.77      | 0.038   |
| Oleoylethanolamide                         | 3.24            | 2.76      | 0.039   |
| 7-Ketodeoxycholic acid                     | 3.02            | 2.72      | 0.025   |
| 2-Pentenoic acid                           | 3.14            | 2.62      | 0.036   |
| LysoPA(18:3/0:0)                           | 2.77            | 2.47      | 0.008   |
| Tryptamine                                 | 2.79            | 2.46      | 0.003   |
| LysoPC(O-16:0/0:0)                         | 2.84            | 2.44      | 0.008   |
| Docosa-pentaenoyl carnitine                | 1.70            | 2.43      | 0.048   |

|                                          |      |      |        |
|------------------------------------------|------|------|--------|
| 7-Sulfocholic acid                       | 2.85 | 2.42 | 0.028  |
| Phenylalanylglycine                      | 2.12 | 2.35 | 0.015  |
| Muricholic acid                          | 2.81 | 2.35 | 0.011  |
| Histidylleucine                          | 2.39 | 2.33 | 0.003  |
| Cholylasparagine                         | 1.92 | 2.33 | 0.014  |
| Tetradecanoylcarnitine                   | 2.58 | 2.33 | <0.001 |
| Deoxycholyproline                        | 2.67 | 2.32 | <0.001 |
| 3-Hydroxyoctadecenoylcarnitine           | 2.58 | 2.30 | <0.001 |
| LysoPA(22:6/0:0)                         | 2.67 | 2.27 | 0.002  |
| LysoPE(18:4/0:0)                         | 2.50 | 2.27 | 0.001  |
| Pentadecanoylcarnitine                   | 2.54 | 2.27 | <0.001 |
| Asparaginy-Valine                        | 2.25 | 2.24 | 0.009  |
| PA(20:5-3OH/10:0)                        | 2.36 | 2.23 | <0.001 |
| Valylphenylalanine                       | 2.59 | 2.21 | 0.010  |
| N2-Acetylornithine                       | 2.48 | 2.20 | 0.012  |
| Leucyl-Glutamate                         | 2.54 | 2.20 | 0.011  |
| PI(16:0/18:0)                            | 2.57 | 2.20 | 0.042  |
| Deoxycholytyrosine                       | 2.20 | 2.19 | 0.012  |
| LysoPC(18:1/0:0)                         | 2.42 | 2.19 | 0.005  |
| Docosapentaenoic acid                    | 2.44 | 2.19 | 0.004  |
| Norcholic acid                           | 2.13 | 2.14 | 0.024  |
| Heptadecanoyl carnitine                  | 2.36 | 2.14 | 0.028  |
| Threonylglycine                          | 1.95 | 2.13 | 0.047  |
| Deoxycholyglutamic acid                  | 2.19 | 2.12 | 0.045  |
| 10,11-Dihydro-12R-hydroxy-leukotriene E4 | 2.28 | 2.10 | 0.008  |
| Leucyl-Glycine                           | 2.72 | 2.10 | 0.017  |
| Histidylalanine                          | 2.29 | 2.09 | 0.023  |
| Lysylhydroxyproline                      | 2.56 | 2.07 | 0.010  |

|                        |      |      |        |
|------------------------|------|------|--------|
| Ketomethylvaleric acid | 2.54 | 2.04 | 0.042  |
| Pyroglutamylleucine    | 2.38 | 2.02 | 0.047  |
| Type III               |      |      |        |
| Stercobilin            | 4.58 | 4.24 | 0.001  |
| Stercobilinogen        | 4.34 | 3.99 | 0.003  |
| Methacholine           | 4.14 | 3.64 | <0.001 |
| PA(18:1-2OH/8:0)       | 3.92 | 3.54 | 0.003  |
| Deoxycholic acid       | 4.12 | 3.44 | 0.007  |
| PC(18:1-2OH/2:0)       | 3.65 | 3.23 | 0.000  |
| Nicotinic acid         | 3.68 | 3.07 | 0.026  |
| LysoPE(16:0/0:0)       | 3.68 | 2.98 | 0.022  |
| Lithocholic acid       | 3.52 | 2.92 | 0.004  |
| Hypoxanthine           | 3.58 | 2.91 | 0.003  |
| MG(20:4/0:0/0:0)       | 3.39 | 2.83 | 0.039  |
| Dodecanedioic acid     | 3.20 | 2.81 | 0.011  |
| Nutriacholic acid      | 3.45 | 2.75 | 0.021  |
| Glutaric acid          | 3.14 | 2.73 | 0.015  |
| Inosine                | 2.86 | 2.54 | 0.001  |
| MG(20:3/0:0/0:0)       | 1.96 | 2.53 | 0.005  |
| N1-Acetylspermidine    | 3.12 | 2.50 | 0.004  |
| Methyl sulfate         | 2.22 | 2.49 | <0.001 |
| Sphinganine            | 2.86 | 2.46 | 0.009  |
| Thiamine               | 2.61 | 2.45 | 0.001  |
| MG(14:1/0:0/0:0)       | 2.53 | 2.44 | 0.006  |
| N-Arachidonoyl GABA    | 2.10 | 2.40 | 0.041  |
| Decenoic acid          | 1.94 | 2.37 | 0.040  |
| Adenosine              | 2.94 | 2.36 | 0.048  |

|                                |      |      |       |
|--------------------------------|------|------|-------|
| LysoPA(18:4/0:0)               | 2.97 | 2.36 | 0.040 |
| Methylglutaric acid            | 2.63 | 2.35 | 0.009 |
| Proline betaine                | 2.93 | 2.32 | 0.003 |
| Malonylcarnitine               | 1.94 | 2.26 | 0.033 |
| Allolithocholic acid           | 2.73 | 2.25 | 0.034 |
| Arginylphenylalanine           | 2.25 | 2.25 | 0.043 |
| Ursodeoxycholic acid           | 2.78 | 2.24 | 0.009 |
| CPA(18:0/0:0)                  | 2.01 | 2.24 | 0.024 |
| PA(8:0/14:0)                   | 2.10 | 2.22 | 0.001 |
| PA(20:4-OH/i-22:0)             | 2.34 | 2.21 | 0.001 |
| Glutamylglutamine              | 2.48 | 2.21 | 0.005 |
| N-Acetyl-L-methionine          | 2.54 | 2.16 | 0.022 |
| DG(22:6-2OH/0:0/20:0)          | 2.67 | 2.16 | 0.030 |
| 7-Oxostigmasterol              | 2.68 | 2.15 | 0.013 |
| 2-Indolecarboxylic acid        | 2.43 | 2.13 | 0.005 |
| LysoPA(8:0/0:0)                | 2.57 | 2.10 | 0.017 |
| DG(PGF1alpha/2:0/0:0)          | 2.52 | 2.09 | 0.008 |
| 6-Octenoylcarnitine            | 2.43 | 2.06 | 0.038 |
| Stearoylglycerophosphoglycerol | 2.42 | 2.06 | 0.030 |
| MG(18:3/0:0/0:0)               | 2.45 | 2.04 | 0.048 |

Abbreviations: CRC, colorectal cancer; LDA, linear discriminant analysis.

<sup>a</sup> Colorectal neoplasms were classified into three distinct gut microbiota enterotypes (subtypes) - type I, type II, and type III - using the Dirichlet multinomial mixture model based on their gut microbiota compositions. The Logarithm Value column displays the logarithm of the highest mean value among the two subtypes for each metabolite, representing the magnitude of the metabolite's peak area in the subtype with the highest mean. The LDA Value column presents the logarithmic LDA score for each discriminative metabolite, quantifying the effect size or the degree of separation between subtypes for each metabolite, with higher LDA scores indicating more significant differences between subtypes. The P Value column shows the p-value from the statistical test (e.g., Kruskal-Wallis test) used to assess the significance of the differences in metabolite peak area between subtypes, where smaller p-values indicate a higher level of statistical significance.

**Table S10.** Differential abundance of metabolites between type I and type III subtypes in CRA group <sup>a</sup>

| Metabolite_Subtype                         | Logarithm value | LDA value | P value |
|--------------------------------------------|-----------------|-----------|---------|
| Type I                                     |                 |           |         |
| Urobilinogen                               | 4.81            | 4.18      | 0.002   |
| L-Phenylalanine                            | 4.43            | 3.87      | 0.045   |
| L-Valine                                   | 4.25            | 3.57      | 0.005   |
| Allocholic acid                            | 3.90            | 3.49      | <0.001  |
| N,N,N-Trimethyl-L-alanyl-L-proline betaine | 3.89            | 3.46      | 0.004   |
| Linoleoyl ethanolamide                     | 3.88            | 3.29      | 0.010   |
| Chenodeoxycholic acid sulfate              | 3.80            | 3.24      | 0.038   |
| Ursodeoxycholic acid 3-sulfate             | 3.63            | 3.21      | 0.001   |
| Cholic acid                                | 3.89            | 3.19      | 0.018   |
| Leucylproline                              | 3.58            | 3.13      | 0.008   |
| 2-Piperidinone                             | 3.64            | 3.09      | 0.004   |
| Isoodeoxycholic acid                       | 3.57            | 3.02      | 0.001   |
| 3-Oxocholic acid                           | 3.49            | 2.99      | 0.001   |
| Tyramine                                   | 3.40            | 2.87      | 0.000   |
| Eicosapentaenoyl Ethanolamide              | 3.44            | 2.86      | 0.012   |
| 7-Ketodeoxycholic acid                     | 3.10            | 2.72      | <0.001  |
| 3-Hydroxyhexanoic acid                     | 3.10            | 2.72      | 0.036   |
| Mesobilirubinogen                          | 3.24            | 2.70      | 0.028   |
| Urothion                                   | 2.10            | 2.69      | 0.013   |
| Oleoylethanolamide                         | 3.25            | 2.68      | 0.015   |
| Docosa-pentaenoyl carnitine                | 1.79            | 2.67      | 0.002   |
| N1,N8-Diacetylspermidine                   | 3.25            | 2.62      | 0.024   |
| N-Acetylhistamine                          | 3.06            | 2.61      | 0.028   |
| L-Palmitoylcarnitine                       | 3.10            | 2.59      | 0.002   |
| Cholylasparagine                           | 1.98            | 2.57      | <0.001  |

|                                     |      |      |        |
|-------------------------------------|------|------|--------|
| 3-Methylthymine                     | 3.11 | 2.55 | 0.018  |
| LysoPE(18:4/0:0)                    | 2.96 | 2.54 | 0.025  |
| Tryptamine                          | 2.86 | 2.54 | <0.001 |
| LysoPA(18:3/0:0)                    | 2.92 | 2.52 | 0.003  |
| 12-Hydroxy-12-octadecanoylcarnitine | 1.87 | 2.49 | 0.020  |
| Oleoylcarnitine                     | 3.11 | 2.49 | 0.003  |
| PC(5-iso PGF2VI/2:0)                | 2.18 | 2.47 | 0.036  |
| Muricholic acid                     | 3.03 | 2.46 | 0.021  |
| 2-Pentenoic acid                    | 3.13 | 2.45 | 0.026  |
| 2-Hydroxyvaleric acid               | 2.78 | 2.44 | 0.006  |
| 5-Methyltetrahydrofolic acid        | 1.97 | 2.43 | 0.006  |
| DG(20:4-OH/0:0/2:0)                 | 3.10 | 2.41 | 0.030  |
| Myristoleoylcarnitine               | 2.95 | 2.40 | 0.005  |
| MG(16:0/0:0/0:0)                    | 2.73 | 2.40 | 0.010  |
| PGP(16:1/16:0)                      | 2.43 | 2.35 | 0.006  |
| 27-Norcholestanehexol               | 2.91 | 2.34 | 0.005  |
| Gluconolactone                      | 2.27 | 2.33 | 0.025  |
| Cholylhistidine                     | 2.32 | 2.33 | 0.007  |
| PA(LTE4/8:0)                        | 1.94 | 2.32 | 0.019  |
| D-Ribulose                          | 2.56 | 2.32 | 0.004  |
| Prolylproline                       | 2.60 | 2.32 | 0.044  |
| L-2-Hydroxyglutaric acid            | 2.62 | 2.32 | 0.003  |
| Alpha-Linolenoyl ethanolamide       | 2.81 | 2.30 | 0.017  |
| 7-Sulfocholic acid                  | 2.74 | 2.30 | 0.005  |
| LysoPC(16:0/0:0)                    | 2.89 | 2.29 | 0.044  |
| Leukotriene E3                      | 1.96 | 2.28 | 0.029  |
| Linolenic acid                      | 2.42 | 2.28 | 0.001  |
| Deoxycholylproline                  | 2.55 | 2.28 | <0.001 |

|                                          |      |      |        |
|------------------------------------------|------|------|--------|
| LysoPI(18:1/0:0)                         | 2.10 | 2.27 | 0.002  |
| DG(20:4-2OH/0:0/2:0)                     | 2.88 | 2.27 | 0.026  |
| Pentadecanoylcarnitine                   | 2.65 | 2.26 | 0.001  |
| Docosapentaenoic acid                    | 2.46 | 2.26 | <0.001 |
| Tyrosyl-Leucine                          | 2.64 | 2.25 | 0.016  |
| LysoPA(22:6/0:0)                         | 2.78 | 2.25 | 0.004  |
| 3-Hydroxyoctadecenoylcarnitine           | 2.35 | 2.24 | <0.001 |
| MG(24:6/0:0/0:0)                         | 2.52 | 2.24 | 0.006  |
| PA(20:5-3OH/10:0)                        | 2.49 | 2.23 | <0.001 |
| Niacinamide                              | 2.53 | 2.22 | 0.044  |
| Tetradecanoylcarnitine                   | 2.52 | 2.22 | 0.002  |
| Leucyl-Glycine                           | 2.75 | 2.21 | 0.033  |
| LysoPA(i-14:0/0:0)                       | 2.63 | 2.19 | 0.006  |
| Histidylleucine                          | 2.42 | 2.19 | 0.045  |
| Prolylhydroxyproline                     | 2.62 | 2.18 | 0.006  |
| 9,10,13-TriHOME                          | 2.68 | 2.17 | 0.011  |
| Taurodehydrocholic acid                  | 2.25 | 2.17 | 0.012  |
| 3'-Deoxythymidine                        | 2.53 | 2.16 | 0.015  |
| Pentadecanone                            | 2.35 | 2.16 | 0.050  |
| 20-Hydroxy-leukotriene E4                | 2.31 | 2.15 | 0.047  |
| N2-Acetylornithine                       | 2.45 | 2.15 | 0.016  |
| Deoxycholylytyrosine                     | 2.38 | 2.15 | 0.012  |
| Deoxycholylyglutamic acid                | 2.49 | 2.14 | 0.022  |
| hydroxyoctadecadienoic acid              | 2.48 | 2.14 | 0.047  |
| linolenyl carnitine                      | 2.39 | 2.13 | 0.026  |
| 10,11-Dihydro-12R-hydroxy-leukotriene E4 | 2.58 | 2.11 | 0.020  |
| N-Stearoyl Serine                        | 2.48 | 2.08 | 0.013  |
| Norcholic acid                           | 2.38 | 2.00 | 0.026  |



Type III

|                               |      |      |        |
|-------------------------------|------|------|--------|
| Stercobilin                   | 4.41 | 3.93 | <0.001 |
| Stercobilinogen               | 4.26 | 3.73 | 0.002  |
| PA(18:1-2OH/8:0)              | 3.87 | 3.19 | 0.030  |
| Deoxycholic acid              | 4.04 | 3.12 | 0.023  |
| Dinor-12-oxophytodienoic Acid | 2.04 | 2.70 | 0.006  |
| 4-Hydroxyestrone sulfate      | 1.96 | 2.65 | 0.001  |
| Glutaric acid                 | 2.99 | 2.61 | <0.001 |
| Xanthosine                    | 2.11 | 2.61 | 0.010  |
| LysoPE(P-16:0/0:0)            | 2.96 | 2.58 | 0.001  |
| Inosine                       | 2.88 | 2.54 | 0.001  |
| 3-Hydroxyhexadecanoic acid    | 2.93 | 2.49 | <0.001 |
| PA(8:0/14:0)                  | 1.99 | 2.49 | 0.010  |
| Uridine                       | 2.05 | 2.41 | 0.033  |
| MG(PGF2alpha/0:0/0:0)         | 3.22 | 2.36 | 0.029  |
| 7,8-Dihydropteroic acid       | 2.36 | 2.33 | 0.005  |
| N-Arachidonoyl GABA           | 1.93 | 2.32 | 0.020  |
| Proline betaine               | 2.83 | 2.31 | 0.045  |
| PG(18:0/TXB2)                 | 2.26 | 2.28 | 0.020  |
| PA(20:4-OH/i-22:0)            | 2.16 | 2.26 | 0.045  |
| N-Acetyl-L-glutamic acid      | 2.94 | 2.25 | 0.035  |
| LysoPA(8:0/0:0)               | 2.71 | 2.25 | <0.001 |
| Sphinganine                   | 2.67 | 2.25 | 0.040  |
| Methylglutaric acid           | 2.26 | 2.23 | 0.015  |
| Cholylglutamic acid           | 2.36 | 2.22 | 0.003  |
| Allolithocholic acid          | 2.50 | 2.20 | 0.011  |
| DG(22:6-2OH/0:0/20:0)         | 2.48 | 2.15 | 0.015  |
| Dimethyl glutarate            | 2.32 | 2.12 | 0.008  |

|                             |      |      |       |
|-----------------------------|------|------|-------|
| LysoPA(22:1/0:0)            | 2.42 | 2.11 | 0.018 |
| MG(PGE1/0:0/0:0)            | 2.51 | 2.09 | 0.023 |
| 3b-Hydroxy-5-cholenoic acid | 2.29 | 2.08 | 0.034 |

Abbreviations: CRA, colorectal adenoma; LDA, linear discriminant analysis.

<sup>a</sup> Colorectal neoplasms were classified into three distinct gut microbiota enterotypes (subtypes) - type I, type II, and type III - using the Dirichlet multinomial mixture model based on their gut microbiota compositions. The Logarithm Value column displays the logarithm of the highest mean value among the two subtypes for each metabolite, representing the magnitude of the metabolite's peak area in the subtype with the highest mean. The LDA Value column presents the logarithmic LDA score for each discriminative metabolite, quantifying the effect size or the degree of separation between subtypes for each metabolite, with higher LDA scores indicating more significant differences between subtypes. The P Value column shows the p-value from the statistical test (e.g., Kruskal-Wallis test) used to assess the significance of the differences in metabolite peak area between subtypes, where smaller p-values indicate a higher level of statistical significance.

**Table S11.** Metabolites with significant differential abundance in both CRC and CRA group comparisons between type I and type III subtypes <sup>a</sup>

| Metabolite_Subtype                         | Colorectal cancer |           |         | Colorectal adenoma |           |         |
|--------------------------------------------|-------------------|-----------|---------|--------------------|-----------|---------|
|                                            | Logarithm value   | LDA value | P value | Logarithm value    | LDA value | P value |
| Type I                                     |                   |           |         |                    |           |         |
| L-Valine                                   | 4.29              | 3.72      | 0.031   | 4.25               | 3.57      | 0.005   |
| Chenodeoxycholic acid sulfate              | 3.95              | 3.60      | 0.006   | 3.80               | 3.24      | 0.038   |
| Cholic acid                                | 3.78              | 3.35      | 0.006   | 3.89               | 3.19      | 0.018   |
| Allocholic acid                            | 3.65              | 3.30      | 0.013   | 3.90               | 3.49      | < 0.001 |
| Ursodeoxycholic acid 3-sulfate             | 3.61              | 3.22      | 0.004   | 3.63               | 3.21      | 0.001   |
| N,N,N-Trimethyl-L-alanyl-L-proline betaine | 3.54              | 3.09      | 0.025   | 3.89               | 3.46      | 0.004   |
| 3-Oxocholic acid                           | 3.31              | 2.95      | 0.004   | 3.49               | 2.99      | 0.001   |
| Oleoylcarnitine                            | 3.22              | 2.87      | < 0.001 | 3.11               | 2.49      | 0.003   |
| L-Palmitoylcarnitine                       | 3.20              | 2.86      | < 0.001 | 3.10               | 2.59      | 0.002   |
| LysoPC(16:0/0:0)                           | 3.24              | 2.84      | 0.022   | 2.89               | 2.29      | 0.044   |
| Leucylproline                              | 3.19              | 2.78      | 0.004   | 3.58               | 3.13      | 0.008   |

|                                          |      |      |         |      |      |         |
|------------------------------------------|------|------|---------|------|------|---------|
| Oleoylethanolamide                       | 3.24 | 2.76 | 0.039   | 3.25 | 2.68 | 0.015   |
| 7-Ketodeoxycholic acid                   | 3.02 | 2.72 | 0.025   | 3.10 | 2.72 | < 0.001 |
| 2-Pentenoic acid                         | 3.14 | 2.62 | 0.036   | 3.13 | 2.45 | 0.026   |
| LysoPA(18:3/0:0)                         | 2.77 | 2.47 | 0.008   | 2.92 | 2.52 | 0.003   |
| Tryptamine                               | 2.79 | 2.46 | 0.003   | 2.86 | 2.54 | < 0.001 |
| Docosa-pentaenoyl carnitine              | 1.70 | 2.43 | 0.048   | 1.79 | 2.67 | 0.002   |
| 7-Sulfocholic acid                       | 2.85 | 2.42 | 0.028   | 2.74 | 2.30 | 0.005   |
| Muricholic acid                          | 2.81 | 2.35 | 0.011   | 3.03 | 2.46 | 0.021   |
| Histidylleucine                          | 2.39 | 2.33 | 0.003   | 2.42 | 2.19 | 0.045   |
| Cholylasparagine                         | 1.92 | 2.33 | 0.014   | 1.98 | 2.57 | < 0.001 |
| Tetradecanoylcarnitine                   | 2.58 | 2.33 | < 0.001 | 2.52 | 2.22 | 0.002   |
| Deoxycholyproline                        | 2.67 | 2.32 | < 0.001 | 2.55 | 2.28 | < 0.001 |
| 3-Hydroxyoctadecenoylcarnitine           | 2.58 | 2.30 | < 0.001 | 2.35 | 2.24 | < 0.001 |
| LysoPA(22:6/0:0)                         | 2.67 | 2.27 | 0.002   | 2.78 | 2.25 | 0.004   |
| LysoPE(18:4/0:0)                         | 2.50 | 2.27 | 0.001   | 2.96 | 2.54 | 0.025   |
| Pentadecanoylcarnitine                   | 2.54 | 2.27 | < 0.001 | 2.65 | 2.26 | 0.001   |
| PA(20:5-3OH/10:0)                        | 2.36 | 2.23 | < 0.001 | 2.49 | 2.23 | < 0.001 |
| N2-Acetylornithine                       | 2.48 | 2.20 | 0.012   | 2.45 | 2.15 | 0.016   |
| Deoxycholytyrosine                       | 2.20 | 2.19 | 0.012   | 2.38 | 2.15 | 0.012   |
| Docosapentaenoic acid                    | 2.44 | 2.19 | 0.004   | 2.46 | 2.26 | < 0.001 |
| Norcholic acid                           | 2.13 | 2.14 | 0.024   | 2.38 | 2.00 | 0.026   |
| Deoxycholyglutamic acid                  | 2.19 | 2.12 | 0.045   | 2.49 | 2.14 | 0.022   |
| 10,11-Dihydro-12R-hydroxy-leukotriene E4 | 2.28 | 2.10 | 0.008   | 2.58 | 2.11 | 0.020   |
| Leucyl-Glycine                           | 2.72 | 2.10 | 0.017   | 2.75 | 2.21 | 0.033   |
| Type III                                 |      |      |         |      |      |         |
| Stercobilin                              | 4.58 | 4.24 | 0.001   | 4.41 | 3.93 | < 0.001 |

|                       |      |      |       |      |      |         |
|-----------------------|------|------|-------|------|------|---------|
| Stercobilinogen       | 4.34 | 3.99 | 0.003 | 4.26 | 3.73 | 0.002   |
| PA(18:1-2OH/8:0)      | 3.92 | 3.54 | 0.003 | 3.87 | 3.19 | 0.030   |
| Deoxycholic acid      | 4.12 | 3.44 | 0.007 | 4.04 | 3.12 | 0.023   |
| Glutaric acid         | 3.14 | 2.73 | 0.015 | 2.99 | 2.61 | < 0.001 |
| Inosine               | 2.86 | 2.54 | 0.001 | 2.88 | 2.54 | 0.001   |
| Sphinganine           | 2.86 | 2.46 | 0.009 | 2.67 | 2.25 | 0.040   |
| N-Arachidonoyl GABA   | 2.10 | 2.40 | 0.041 | 1.93 | 2.32 | 0.020   |
| Methylglutaric acid   | 2.63 | 2.35 | 0.009 | 2.26 | 2.23 | 0.015   |
| Proline betaine       | 2.93 | 2.32 | 0.003 | 2.83 | 2.31 | 0.045   |
| Allolithocholic acid  | 2.73 | 2.25 | 0.034 | 2.50 | 2.20 | 0.011   |
| PA(8:0/14:0)          | 2.10 | 2.22 | 0.001 | 1.99 | 2.49 | 0.010   |
| PA(20:4-OH/i-22:0)    | 2.34 | 2.21 | 0.001 | 2.16 | 2.26 | 0.045   |
| DG(22:6-2OH/0:0/20:0) | 2.67 | 2.16 | 0.030 | 2.48 | 2.15 | 0.015   |
| LysoPA(8:0/0:0)       | 2.57 | 2.10 | 0.017 | 2.71 | 2.25 | < 0.001 |

Abbreviations: CRA, colorectal adenoma; CRC, colorectal cancer; LDA, linear discriminant analysis.

<sup>a</sup> Colorectal neoplasms were classified into three distinct gut microbiota enterotypes (subtypes) - type I, type II, and type III - using the Dirichlet multinomial mixture model based on their gut microbiota compositions. The Logarithm Value column displays the logarithm of the highest mean value among the two subtypes for each metabolite, representing the magnitude of the metabolite's peak area in the subtype with the highest mean. The LDA Value column presents the logarithmic LDA score for each discriminative metabolite, quantifying the effect size or the degree of separation between subtypes for each metabolite, with higher LDA scores indicating more significant differences between subtypes. The P Value column shows the p-value from the statistical test (e.g., Kruskal-Wallis test) used to assess the significance of the differences in metabolite peak area between subtypes, where smaller p-values indicate a higher level of statistical significance.

**Table S12.** Pathway analysis results for differential metabolites between type I and type III subtypes in colorectal cancer group <sup>a</sup>

| Pathway                                     | Total | Hits | Metabolite                       | Subtype  | Raw p  | -log10(p) | Holm p | FDR    | Impact |
|---------------------------------------------|-------|------|----------------------------------|----------|--------|-----------|--------|--------|--------|
| Fatty acid degradation                      | 39    | 1    | L-Palmitoylcarnitine             | type I   | <0.001 | 5.23      | <0.001 | <0.001 | 0      |
| Tryptophan metabolism                       | 41    | 1    | Tryptamine                       | type I   | 0.003  | 2.51      | 0.025  | 0.007  | 0.040  |
| Primary bile acid biosynthesis              | 46    | 1    | Cholic acid                      | type I   | 0.018  | 1.76      | 0.105  | 0.030  | 0      |
| Glycerophospholipid metabolism              | 36    | 1    | LysoPC(16:0/0:0)                 | type I   | 0.071  | 1.15      | 0.357  | 0.075  | 0.017  |
| Valine, leucine and isoleucine degradation  | 40    | 1    | L-Valine                         | type I   | 0.075  | 1.12      | 0.357  | 0.075  | 0      |
| Valine, leucine and isoleucine biosynthesis | 8     | 1    | L-Valine                         | type I   | 0.075  | 1.12      | 0.357  | 0.075  | 0      |
| Pantothenate and CoA biosynthesis           | 19    | 1    | L-Valine                         | type I   | 0.075  | 1.12      | 0.357  | 0.075  | 0      |
| Aminoacyl-tRNA biosynthesis                 | 48    | 1    | L-Valine                         | type I   | 0.075  | 1.12      | 0.357  | 0.075  | 0      |
| Purine metabolism                           | 65    | 3    | Adenosine; Hypoxanthine; Inosine | type III | 0.000  | 3.44      | 0.004  | 0.002  | 0.020  |
| Thiamine metabolism                         | 7     | 1    | Thiamine                         | type III | 0.001  | 3.25      | 0.006  | 0.002  | 0      |
| Sphingolipid metabolism                     | 21    | 1    | Sphinganine                      | type III | 0.002  | 2.62      | 0.022  | 0.007  | 0.154  |
| Nicotinate and nicotinamide metabolism      | 15    | 1    | Nicotinic acid                   | type III | 0.011  | 1.97      | 0.075  | 0.021  | 0      |

Abbreviations: FDR, false discovery rate.

<sup>a</sup> Colorectal neoplasms were classified into three distinct gut microbiota enterotypes (subtypes) - type I, type II, and type III - using the Dirichlet multinomial mixture model based on their gut microbiota compositions. The Total column shows the total number of compounds in the pathway; the Hits column presents the number of compounds that match with the differential metabolites; the Metabolite column lists the matched differential metabolites; the Subtype column indicates the subtype(s) where the corresponding pathway is significantly enriched; the Raw p column shows the original p value calculated from the enrichment analysis; the Holm p column shows the p value adjusted by the Holm-Bonferroni method; the FDR column shows the p value adjusted using False Discovery Rate; and the Impact column shows the pathway impact value calculated from pathway topology analysis.

**Table S13.** Pathway analysis results for differential metabolites between type I and type III subtypes in colorectal adenoma group<sup>a</sup>

| Pathway                                             | Total | Hits | Metabolite                   | Subtype  | Raw p  | -log10(p) | Holm p | FDR    | Impact |
|-----------------------------------------------------|-------|------|------------------------------|----------|--------|-----------|--------|--------|--------|
| Tryptophan metabolism                               | 41    | 1    | Tryptamine                   | type I   | <0.001 | 5.05      | <0.001 | <0.001 | 0.040  |
| Tyrosine metabolism                                 | 42    | 1    | Tyramine                     | type I   | <0.001 | 3.40      | 0.008  | 0.003  | 0.025  |
| Fatty acid degradation                              | 39    | 1    | L-Palmitoylcarnitine         | type I   | 0.002  | 2.62      | 0.043  | 0.012  | 0      |
| One carbon pool by folate                           | 9     | 1    | 5-Methyltetrahydrofolic acid | type I   | 0.004  | 2.38      | 0.071  | 0.012  | 0      |
| Primary bile acid biosynthesis                      | 46    | 1    | Cholic acid                  | type I   | 0.004  | 2.36      | 0.071  | 0.012  | 0      |
| alpha-Linolenic acid metabolism                     | 13    | 1    | Linolenic acid               | type I   | 0.004  | 2.35      | 0.071  | 0.012  | 0.333  |
| Biosynthesis of unsaturated fatty acids             | 36    | 1    | Linolenic acid               | type I   | 0.004  | 2.35      | 0.071  | 0.012  | 0      |
| Pantothenate and CoA biosynthesis                   | 19    | 1    | L-Valine                     | type I   | 0.010  | 2.01      | 0.117  | 0.017  | 0      |
| Valine, leucine and isoleucine biosynthesis         | 8     | 1    | L-Valine                     | type I   | 0.010  | 2.01      | 0.117  | 0.017  | 0      |
| Valine, leucine and isoleucine degradation          | 40    | 1    | L-Valine                     | type I   | 0.010  | 2.01      | 0.117  | 0.017  | 0      |
| Aminoacyl-tRNA biosynthesis                         | 48    | 2    | L-Phenylalanine; L-Valine    | type I   | 0.013  | 1.90      | 0.117  | 0.020  | 0      |
| Glycerophospholipid metabolism                      | 36    | 1    | LysoPC(16:0/0:0)             | type I   | 0.029  | 1.54      | 0.201  | 0.040  | 0.017  |
| Phenylalanine, tyrosine and tryptophan biosynthesis | 4     | 1    | L-Phenylalanine              | type I   | 0.055  | 1.26      | 0.276  | 0.064  | 0.500  |
| Phenylalanine metabolism                            | 10    | 1    | L-Phenylalanine              | type I   | 0.055  | 1.26      | 0.276  | 0.064  | 0.357  |
| Pentose phosphate pathway                           | 22    | 1    | Gluconolactone               | type I   | 0.059  | 1.23      | 0.276  | 0.066  | 0      |
| Purine metabolism                                   | 65    | 2    | Xanthosine; Inosine          | type III | <0.001 | 3.86      | 0.003  | 0.001  | 0.002  |
| Folate biosynthesis                                 | 27    | 1    | 7,8-Dihydropteroic acid      | type III | 0.007  | 2.17      | 0.087  | 0.016  | 0      |
| Nicotinate and nicotinamide metabolism              | 15    | 1    | Nicotinic acid               | type III | 0.013  | 1.88      | 0.117  | 0.020  | 0.194  |
| Pyrimidine metabolism                               | 39    | 1    | Uridine                      | type III | 0.034  | 1.46      | 0.207  | 0.045  | 0.016  |
| Arginine biosynthesis                               | 14    | 1    | N-Acetyl-L-glutamic acid     | type III | 0.071  | 1.15      | 0.276  | 0.075  | 0      |
| Sphingolipid metabolism                             | 21    | 1    | Sphinganine                  | type III | 0.085  | 1.07      | 0.276  | 0.085  | 0.154  |

Abbreviations: FDR, false discovery rate.

<sup>a</sup> Colorectal neoplasms were classified into three distinct gut microbiota enterotypes (subtypes) - type I, type II, and type III - using the Dirichlet multinomial

mixture model based on their gut microbiota compositions. The Total column shows the total number of compounds in the pathway; the Hits column presents the number of compounds that match with the differential metabolites; the Metabolite column lists the matched differential metabolites; the Subtype column indicates the subtype(s) where the corresponding pathway is significantly enriched; the Raw p column shows the original p value calculated from the enrichment analysis; the Holm p column shows the p value adjusted by the Holm-Bonferroni method; the FDR column shows the p value adjusted using False Discovery Rate; and the Impact column shows the pathway impact value calculated from pathway topology analysis.

**Table S14.** Correlation between differential metabolites and differential bacterial genera in type I CRC subgroup <sup>a</sup>

| Metabolite                                 | Actinomyces |       |      | Alistipes |       |      | Bacillus |       |      | Bacteroides |       |      | Eggerthella |       |      | Family XIII AD3011 group |       |      | Lachnospiraceae. incertae sedis |       |      | Odoribacter |       |      |
|--------------------------------------------|-------------|-------|------|-----------|-------|------|----------|-------|------|-------------|-------|------|-------------|-------|------|--------------------------|-------|------|---------------------------------|-------|------|-------------|-------|------|
|                                            | CC          | p     | FDR  | CC        | p     | FDR  | CC       | p     | FDR  | CC          | p     | FDR  | CC          | p     | FDR  | CC                       | p     | FDR  | CC                              | p     | FDR  | CC          | p     | FDR  |
| Allolithocholic acid                       | -0.17       | 0.16  | 0.64 | 0.45      | <0.01 | 0.05 | -0.57    | <0.01 | 0.01 | 0.19        | 0.14  | 0.60 | -0.05       | 0.71  | 0.93 | 0.14                     | 0.28  | 0.75 | 0.01                            | 0.96  | 0.99 | 0.13        | 0.29  | 0.76 |
| Asparaginyln-Valine                        | 0.06        | 0.62  | 0.90 | -0.13     | 0.28  | 0.75 | -0.05    | 0.71  | 0.93 | 0.16        | 0.20  | 0.69 | 0.46        | <0.01 | 0.05 | -0.17                    | 0.17  | 0.65 | -0.14                           | 0.26  | 0.73 | -0.05       | 0.71  | 0.93 |
| Deoxycholyproline                          | 0.15        | 0.23  | 0.72 | -0.04     | 0.78  | 0.95 | 0.09     | 0.46  | 0.84 | 0.08        | 0.55  | 0.88 | 0.07        | 0.56  | 0.89 | -0.09                    | 0.47  | 0.85 | -0.51                           | <0.01 | 0.02 | 0.07        | 0.60  | 0.90 |
| DG(22:6-2OH/0:0/20:0)                      | -0.16       | 0.20  | 0.68 | 0.44      | <0.01 | 0.06 | -0.54    | <0.01 | 0.01 | 0.18        | 0.14  | 0.61 | -0.05       | 0.67  | 0.92 | 0.10                     | 0.43  | 0.82 | -0.02                           | 0.89  | 0.98 | 0.10        | 0.43  | 0.83 |
| Dodecanedioic acid                         | -0.31       | 0.01  | 0.25 | 0.27      | 0.03  | 0.35 | -0.55    | <0.01 | 0.01 | 0.37        | <0.01 | 0.13 | 0.06        | 0.64  | 0.91 | 0.09                     | 0.45  | 0.84 | 0.02                            | 0.87  | 0.97 | -0.03       | 0.80  | 0.95 |
| Glutaric acid                              | -0.18       | 0.14  | 0.62 | 0.34      | 0.01  | 0.19 | -0.47    | <0.01 | 0.05 | 0.32        | 0.01  | 0.24 | 0.01        | 0.92  | 0.98 | 0.06                     | 0.63  | 0.91 | 0.01                            | 0.91  | 0.98 | 0.02        | 0.85  | 0.97 |
| Inosine                                    | -0.03       | 0.81  | 0.96 | 0.21      | 0.09  | 0.53 | -0.48    | <0.01 | 0.04 | 0.22        | 0.08  | 0.51 | 0.12        | 0.34  | 0.78 | -0.14                    | 0.26  | 0.73 | -0.03                           | 0.84  | 0.96 | 0.09        | 0.48  | 0.85 |
| Lithocholic acid                           | -0.23       | 0.06  | 0.47 | 0.42      | <0.01 | 0.07 | -0.46    | <0.01 | 0.05 | 0.29        | 0.02  | 0.31 | -0.01       | 0.96  | 0.99 | 0.08                     | 0.52  | 0.87 | -0.06                           | 0.64  | 0.91 | 0.18        | 0.15  | 0.62 |
| L-Valine                                   | 0.46        | <0.01 | 0.05 | -0.30     | 0.01  | 0.28 | 0.36     | <0.01 | 0.16 | -0.21       | 0.09  | 0.53 | 0.09        | 0.49  | 0.86 | -0.34                    | 0.01  | 0.19 | 0.19                            | 0.12  | 0.58 | -0.25       | 0.04  | 0.41 |
| Methylglutaric acid                        | -0.18       | 0.15  | 0.62 | 0.50      | <0.01 | 0.02 | -0.51    | <0.01 | 0.02 | 0.29        | 0.02  | 0.31 | 0.03        | 0.83  | 0.96 | 0.00                     | 0.98  | 0.99 | 0.01                            | 0.96  | 0.99 | 0.11        | 0.38  | 0.80 |
| N,N,N-Trimethyl-L-alanyl-L-proline betaine | 0.34        | 0.01  | 0.20 | -0.32     | 0.01  | 0.24 | 0.38     | <0.01 | 0.13 | -0.13       | 0.30  | 0.76 | 0.05        | 0.68  | 0.93 | -0.47                    | <0.01 | 0.04 | -0.10                           | 0.41  | 0.82 | -0.30       | 0.01  | 0.28 |
| N1-Acetylspermidine                        | 0.16        | 0.21  | 0.70 | -0.22     | 0.08  | 0.50 | 0.04     | 0.75  | 0.94 | 0.07        | 0.58  | 0.89 | 0.30        | 0.02  | 0.28 | -0.50                    | <0.01 | 0.02 | -0.02                           | 0.90  | 0.98 | -0.36       | <0.01 | 0.17 |
| PA(20:4-OH/i-22:0)                         | -0.19       | 0.12  | 0.58 | 0.37      | <0.01 | 0.15 | -0.46    | <0.01 | 0.05 | 0.27        | 0.03  | 0.34 | 0.06        | 0.63  | 0.91 | 0.12                     | 0.33  | 0.78 | -0.03                           | 0.82  | 0.96 | 0.10        | 0.43  | 0.83 |
| PA(20:5-3OH/10:0)                          | 0.19        | 0.13  | 0.59 | -0.28     | 0.02  | 0.32 | 0.00     | 1.00  | 1.00 | 0.10        | 0.43  | 0.83 | 0.19        | 0.12  | 0.58 | -0.27                    | 0.03  | 0.35 | -0.13                           | 0.32  | 0.77 | -0.48       | <0.01 | 0.03 |
| Tryptamine                                 | 0.04        | 0.77  | 0.95 | -0.03     | 0.81  | 0.96 | 0.01     | 0.92  | 0.98 | 0.48        | <0.01 | 0.03 | 0.25        | 0.04  | 0.40 | -0.25                    | 0.04  | 0.41 | -0.21                           | 0.10  | 0.55 | -0.13       | 0.31  | 0.77 |

Abbreviations: CC, correlation coefficient; CRC, colorectal cancer; FDR, false discovery rate.

<sup>a</sup> Colorectal neoplasms were classified into three distinct gut microbiota enterotypes (subtypes) - type I, type II, and type III - using the Dirichlet multinomial mixture model based on their gut microbiota compositions. Only differential metabolites and differential bacterial genera that have at least one pair of correlation analysis with an FDR-corrected p-value less than 0.05 are displayed in the table. The CC column represents the strength and direction of the relationship between differential metabolites and differential bacterial genera. The p column from the correlation analysis indicates the probability of observing a correlation as strong as the one calculated by chance. The FDR column adjusts the original p-value to control the false discovery rate. Cells with FDR values less than 0.05 are highlighted in yellow to indicate statistical significance.



## Supplementary Figure

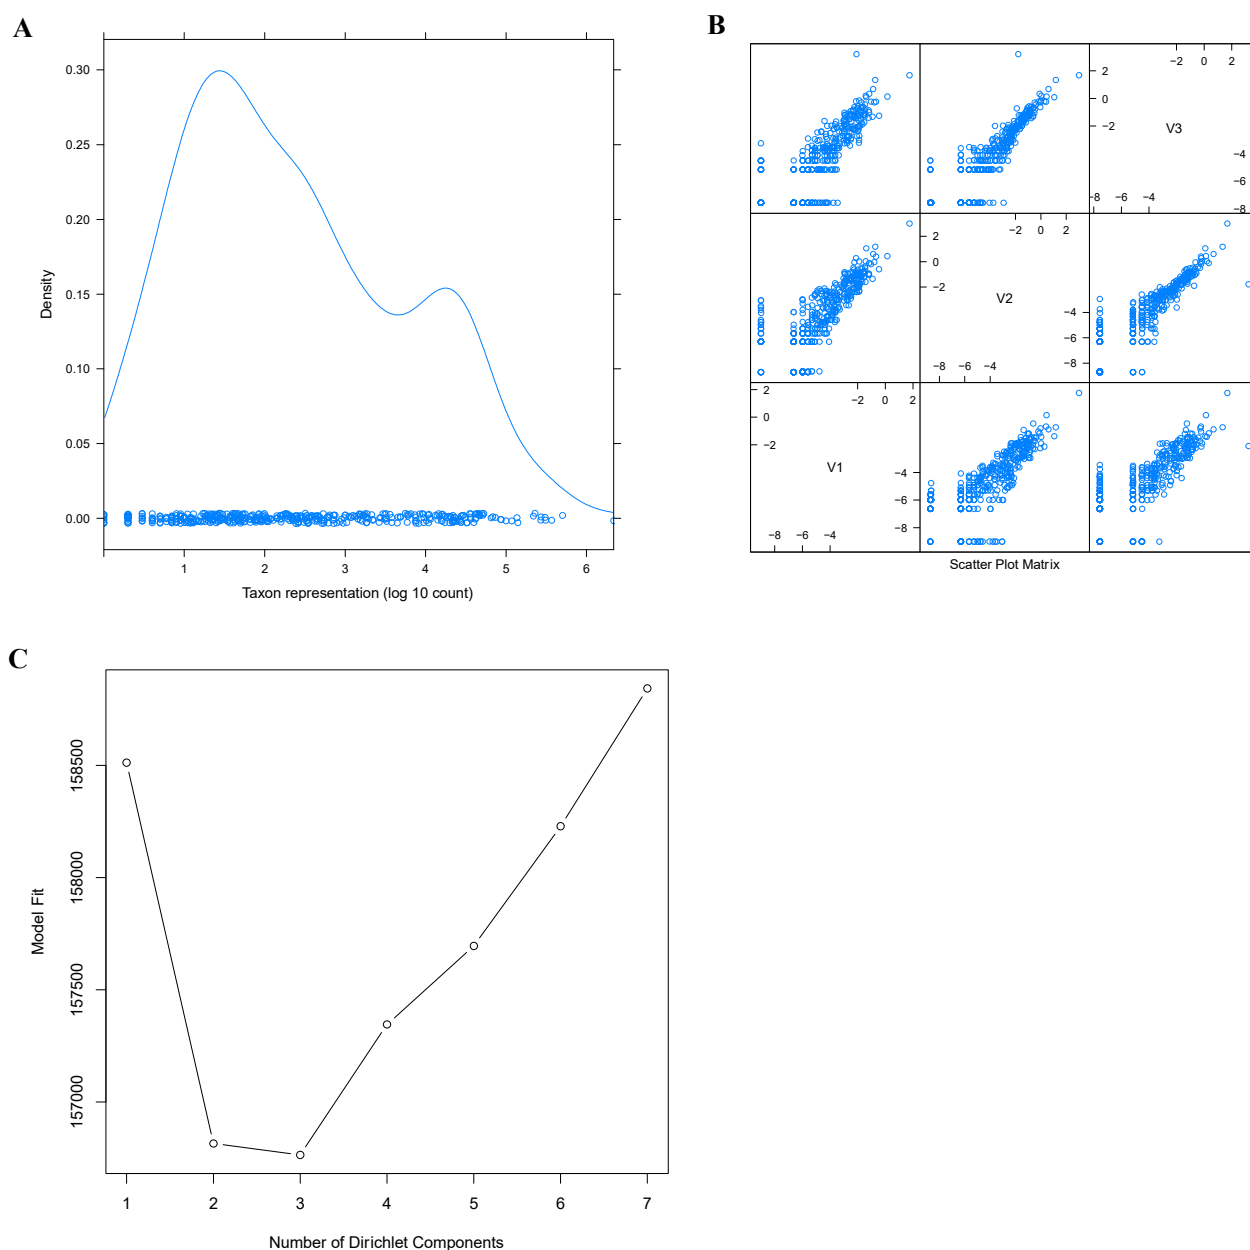

**Figure S1.** Combined visualization of taxon representation, scatterplot matrix, and Laplace approximate log-likelihood values for the Dirichlet Multinomial mixture model. (A) Density plot and scatter plot of log<sub>10</sub>(count) taxon representation for 466 bacterial genera across 250 cases, illustrating the overall distribution and individual log<sub>10</sub>(count) values. The smooth curve denotes the probability density distribution of the logarithmically-transformed abundance of bacterial genera, while the individual points beneath the curve correspond to the log<sub>10</sub>(count) values for each of the 466 bacterial genera. (B) Scatterplot matrix of log-transformed fitted values for the optimal Dirichlet Multinomial mixture model. Each panel exhibits the relationship between log-transformed fitted values of two components (V1, V2, and V3) within the mixture model. A positive correlation can be observed between the components in each panel. (C) Laplace approximate log-likelihood values

plotted against the number of Dirichlet components for the Dirichlet Multinomial mixture model. The x-axis represents the number of Dirichlet components, ranging from 1 to 7, while the y-axis displays the corresponding Laplace approximate log-likelihood values. The plot suggests that the optimal number of clusters for the best-fitting model is 3, as it coincides with the minimum Laplace approximate log-likelihood value.

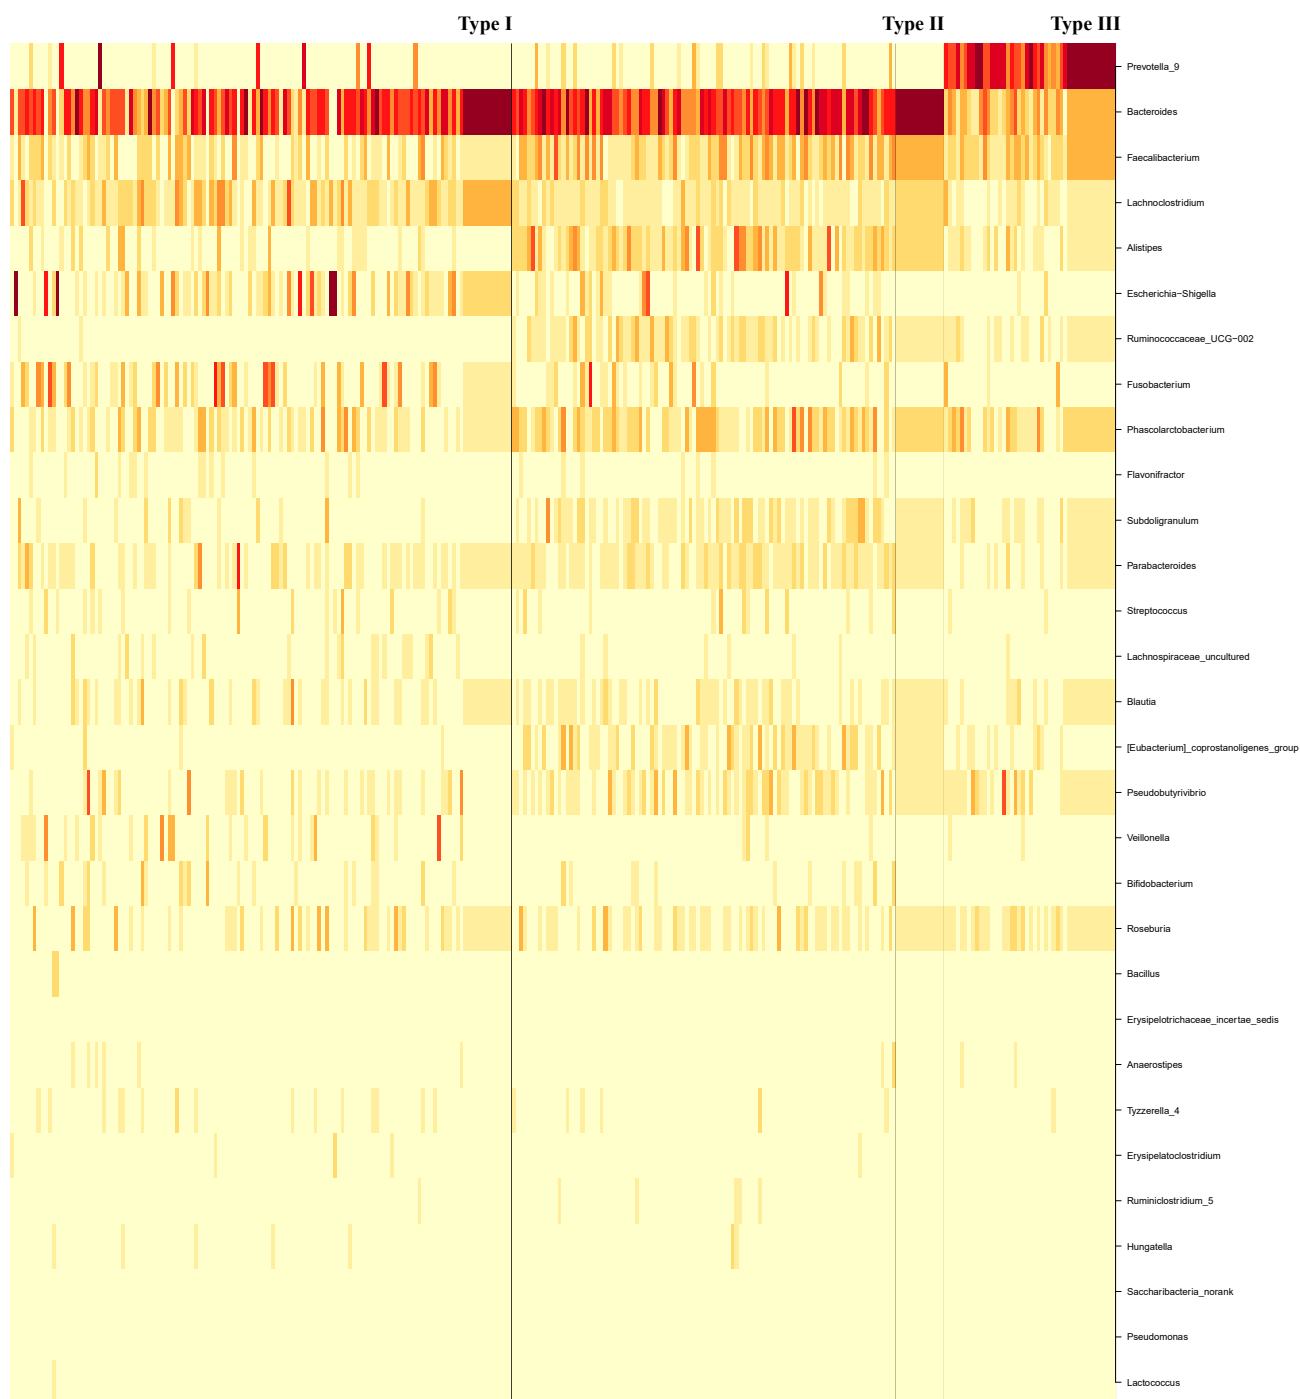

**Figure S2.** Heatmap of the top 30 taxa with the largest differences between the baseline model and the best Dirichlet multinomial mixture model. Each row represents one of the 30 taxa, sorted in descending order. The narrow columns illustrate individual samples, while the wide columns indicate the three enterotypes (type I, type II, and type III). On the left side, multiple narrow columns correspond to all samples of type I, followed by a wide column for type I. This pattern repeats for type II and type III. The color intensity of red signifies the degree of difference, where darker shades represent larger differences.

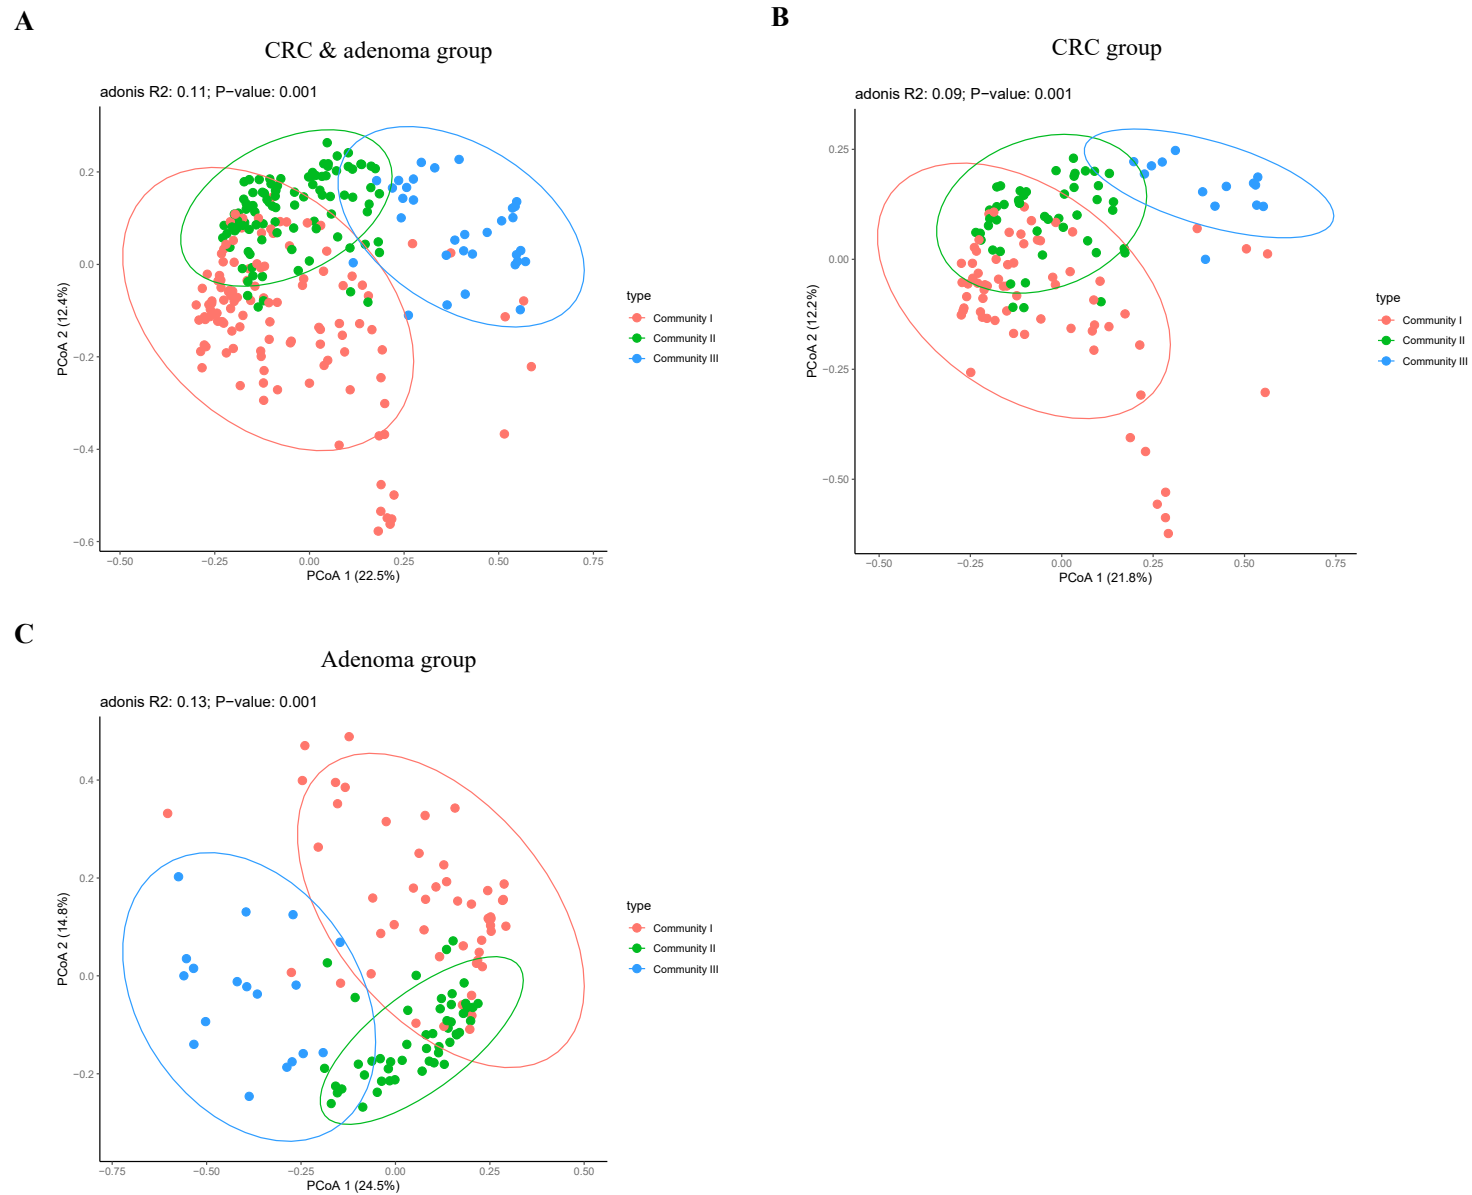

**Figure S3.** Principal coordinate analysis (PCoA) plots based on Bray-Curtis distances depict the three distinct microbial community groups (type

I, type II, and type III) in (A) colorectal neoplasm, (B) colorectal cancer (CRC), and (C) colorectal adenoma (CRA) samples. Each plot displays PCoA 1 on the x-axis and PCoA 2 on the y-axis. In all plots, samples are represented by red (type I), green (type II), and blue (type III) points, with surrounding ellipses illustrating the 95% confidence interval for each group. The relationships and overlaps among the ellipses are detailed for each plot. These visualizations emphasize the associations and intersections between the three identified microbial community profiles in colorectal neoplasm, CRC, and CRA samples.

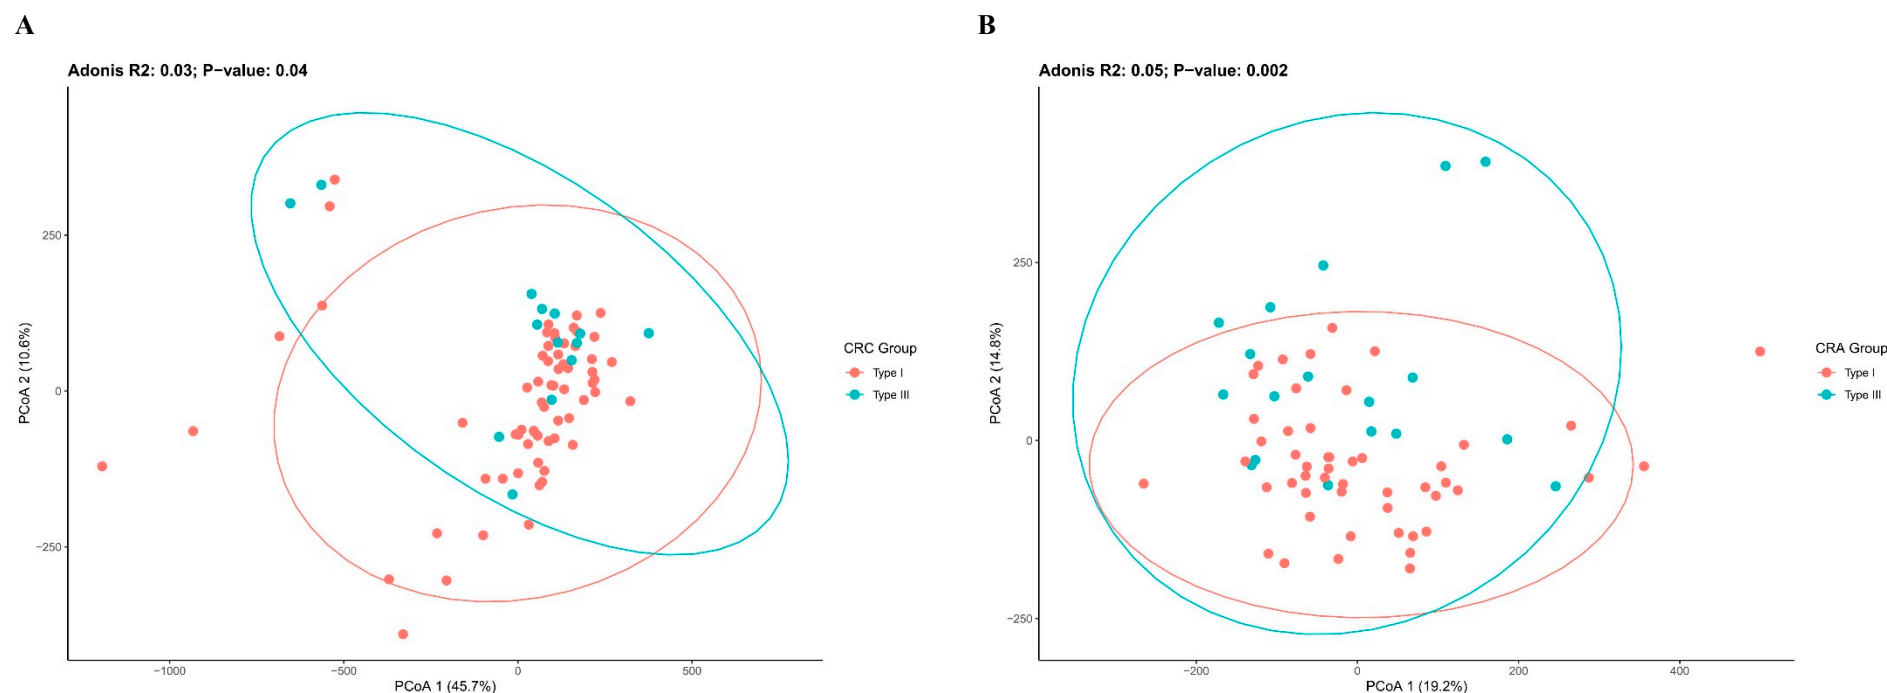

**Figure S4.** Principal coordinate analysis (PCoA) plots based on Manhattan distances illustrate the distinct metabolic profiles between subtypes (type I and type III) in (A) colorectal cancer (CRC) and (B) colorectal adenoma (CRA) samples. Each plot displays PCoA 1 on the x-axis and PCoA 2 on the y-axis. Samples are represented by red (type I) and blue (type III) points, with surrounding ellipses illustrating the 95% confidence interval for each group. The relationships and overlaps among the ellipses are detailed for each plot.

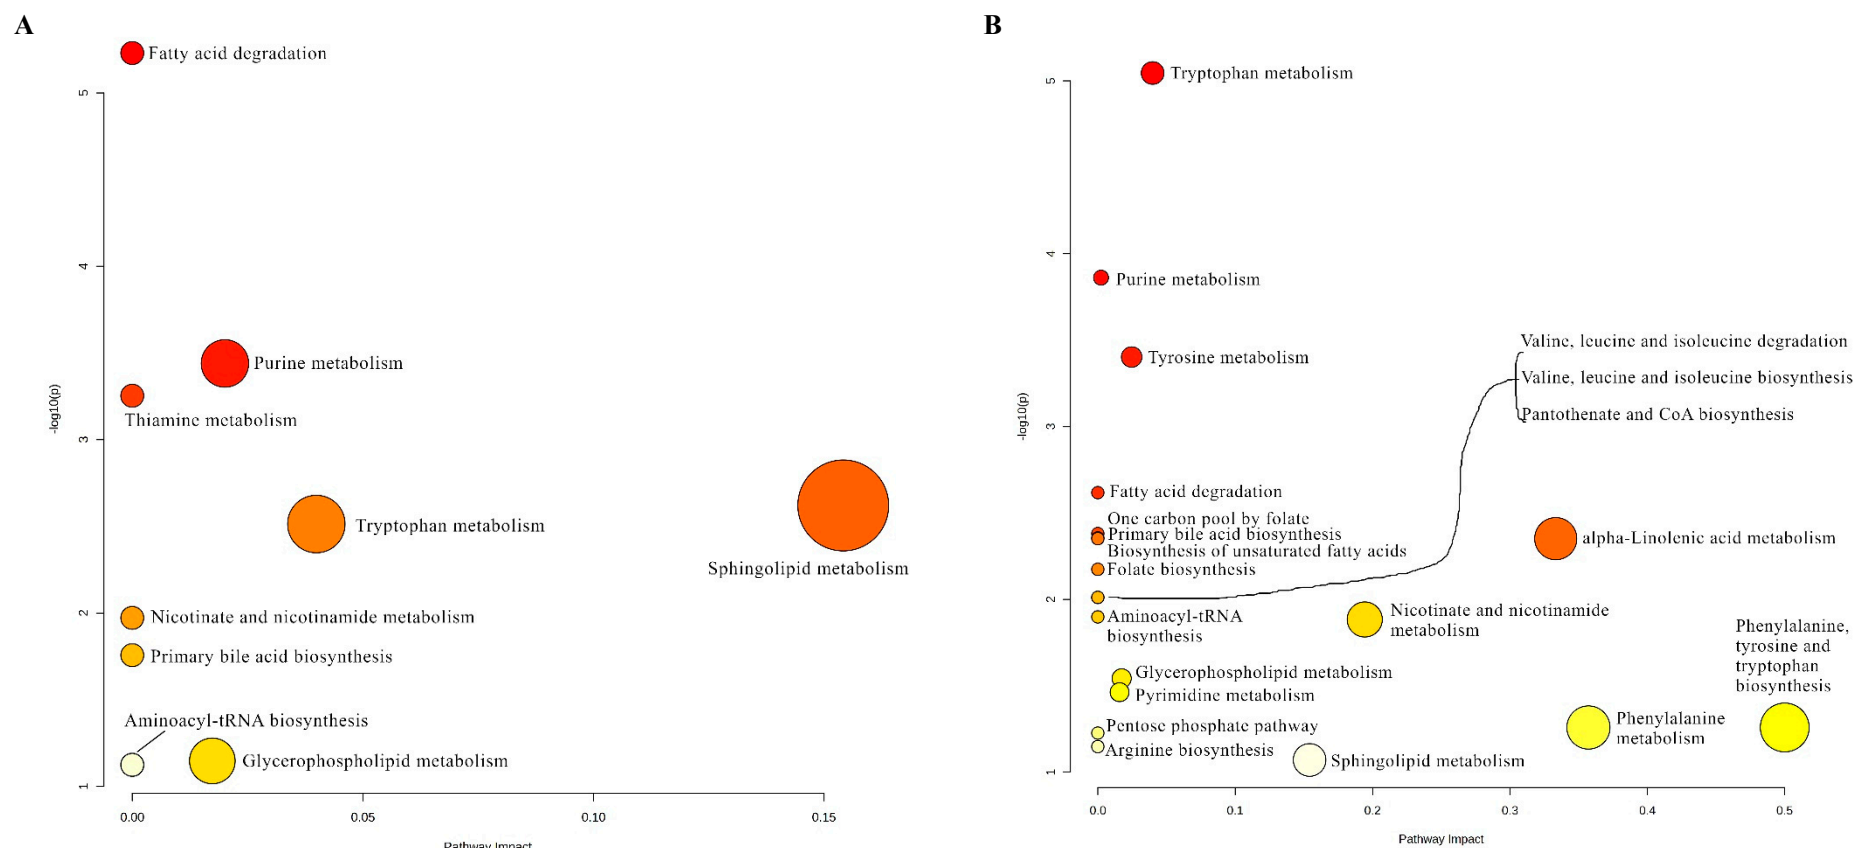

**Figure S5.** Overview of pathway analysis for differential metabolites between type I and type III subtypes in (A) colorectal cancer and (B) colorectal adenoma groups. All matched pathways are depicted as circles according to the original p values obtained from the pathway enrichment analysis and the pathway impact values from the pathway topology analysis, where larger circles represent higher pathway impact values. The circles are colored from red to yellow, with darker shades indicating smaller original p values and higher  $-\log_{10}(p)$  values from the enrichment analysis.
